# Supplementary material for: Is K-Struvite Precipitation a Plausible Nutrient Recovery Method from Potassium-Containing Wastes?—A Review
Source: MDPI journal article supplement (doi:10.3390/su141811680), 2022-09-17
Supplement: s1 [file s1]

## SUPPLEMENTARY MATERIAL

# Is K-Struvite Precipitation a Plausible Nutrient Recovery Method from Potassium-Containing Wastes? — A Review

Işık Kabdaşlı<sup>1,\*†</sup>, Alessio Siciliano<sup>2,\*†</sup>, Carlo Limonti<sup>2,†</sup> and Olcay Tünay<sup>1,†</sup>

<sup>1</sup> Environmental Engineering Department, Civil Engineering Faculty, İstanbul Technical University, Ayazağa Campus, Sarıyer, İstanbul 34469, Turkey

<sup>2</sup> Laboratory of Sanitary and Environmental Engineering, Department of Environmental Engineering, University of Calabria, 87036 Rende (CS), Italy

\* Correspondence: kabdasli@itu.edu.tr (I.K.); alessio.siciliano@unical.it (A.S.)

† These authors contributed equally to this work.

**Table S1. Results of MPP and MAP precipitation conducted on various wastes and using different reactors**

| Sample | Compound recovered | Reagent for pH setting | Reagents                             | Optimal pH | Optimal molar dosages | Recovery efficiencies | Reactor Type | Working Mode | V or Q | HRT/ Reaction time | Economic analysis | Remarks                                                                          | Ref. |
|--------|--------------------|------------------------|--------------------------------------|------------|-----------------------|-----------------------|--------------|--------------|--------|--------------------|-------------------|----------------------------------------------------------------------------------|------|
| SPU    | MPP                | NaOH                   | MgCL <sub>2</sub> ·6H <sub>2</sub> O | 11         | Mg:K:P= 2:1:2         | 98 % P<br>77 % K      | CSTR         | Batch        | 0.5 L  | -                  | -                 | Co-precipitation of struvite-type compounds significantly reduced the K removal. | [14] |
| SPS    | MPP and MAP        | NaOH                   | MgCL <sub>2</sub> ·6H <sub>2</sub> O | 11         | Mg:P=0.7<br>K:P=1     | 95.5 % P              | BCRDT        | Continuous   | 10 L   | 1.98               | -                 | MPP is more effective fertilizer than compost                                    | [15] |

|                              |             |                   |                                                                                             |          |                   |                        |                                    |            |                      |            |                                                |                                                                                                                                                                                                                                        |      |
|------------------------------|-------------|-------------------|---------------------------------------------------------------------------------------------|----------|-------------------|------------------------|------------------------------------|------------|----------------------|------------|------------------------------------------------|----------------------------------------------------------------------------------------------------------------------------------------------------------------------------------------------------------------------------------------|------|
| SPU                          | MPP and MAP | NaOH              | MgCL <sub>2</sub> ·6H <sub>2</sub> O                                                        | 9        | Mg: P = 1:2       | 89 % P                 | CSTR                               | Continuous | 0.77 L               | 1.63 h     | -                                              | At volume index of 500 mL/g P <sup>b</sup> ; 1.2% of influent P scaled on the reactor wall at 100 rpm mixing speed. At volume index of 310 mL/g P <sup>b</sup> ; 5.3% of influent P scaled on the reactor wall at 300rpm mixing speed. | [17] |
| SPU                          | MPP and MAP | NaOH              | MgCL <sub>2</sub> ·6H <sub>2</sub> O                                                        | 11 ± 0.1 | K:Mg:P= 1:1:1     | 64 ± 2% K<br>96 ± 1% P | CSTR                               | Continuous | 4 L· h <sup>-1</sup> | 10 min     | -                                              | Order of the effect is as NH <sub>4</sub> >Ca <sup>2+</sup> >Na <sup>+</sup> on the K-struvite precipitation performance.                                                                                                              | [23] |
| Sugarcane vinasse wastewater | MPP         | NaOH              | MgSO <sub>4</sub>                                                                           | 10       | Mg:K:P= 2:1:2     | 72%K                   | Integrated electrodialysis reactor | Batch      | -                    | -          | -                                              | K recovery of 72 % and energy consumption of 0.4 kWh m <sup>-3</sup> .                                                                                                                                                                 | [26] |
| Semi-conductor wastewater    | MPP and MAP | NaOH              | MgCL <sub>2</sub> ·6H <sub>2</sub> O                                                        | 9        | Mg:N:P =2.5:15:1  | 92.5 % P               | CSTR                               | Batch      | 1 L                  | 40min      | -                                              | High Mg concentration increased removal efficiency of PO <sub>4</sub> <sup>3-</sup> but altered struvite purity. Bobierite became the dominant species in the solid phase.                                                             | [27] |
| Real urine wastewater        | MPP         | NaOH              | MgSO <sub>4</sub><br>Na <sub>2</sub> HPO <sub>4</sub> ·12H <sub>2</sub> O                   | 11.4     | Mg:K:P = 3.3:1:3  | 42-68 % P              | DTBR                               | Continuous | 2.5 L <sup>c</sup>   | 2.5-12.5 h | -                                              | HRT ≥ 7.5 h and mixing speed ≤ 200 rpm for good crystal settling characteristics. Excess slurry concentration blocks the fluid flow across the accumulated slurry.                                                                     | [29] |
| SPU                          | MPP         | NaOH              | MgCL <sub>2</sub> ·6H <sub>2</sub> O<br>NaH <sub>2</sub> PO <sub>4</sub> ·2H <sub>2</sub> O | 10.5     | Mg:K:P= 1:1:1     | 99 % P<br>70 % K       | FBHC column                        | Continuous | 0.55 L               | 1.6h       | -                                              | Breakage of the precipitates under the intensive turbulence within the reactor. The up-flow velocity = 1.5 – 2.0 times the minimum fluidization velocity (MFV) for the effective fluidization.                                         | [30] |
| SCWG liquid fraction         | MPP         | NaOH              | MgCL <sub>2</sub> ·6H <sub>2</sub> O                                                        | 11       | Mg:P = 1:2        | 94 % P<br>42 % K       | CSTR                               | Batch      | -                    | -          | -                                              | The low K removal efficiency is attributable to the excess of potassium in the treating samples.                                                                                                                                       | [31] |
| SPU                          | MPP         | NaOH/<br>Aeration | MgCL <sub>2</sub> ·6H <sub>2</sub> O                                                        | 12       | Mg:K:P= 1:1:1     | 96 % P                 | CSTR                               | Batch      | 0.1 L                |            | 3.99 - 6.28 \$/m <sup>3</sup> of treated urine | pH and Na <sup>+</sup> concentration significantly affect the Na-struvite formation.                                                                                                                                                   | [32] |
| Landfill leachate            | MAP         | NaOH/<br>Aeration | MgCL <sub>2</sub> ·6H <sub>2</sub> O                                                        | 9        | Mg:N:P= 1.2:1:1.2 | 99 % P<br>96 % N       | CSTR                               | Batch      | 0.2 L                | 30 min     | -                                              | Multiple recycling tests showed a progressive reduction of ammonium removal by exclusively exploiting struvite residues as a magnesium and phosphorus source for the treatment of raw leachate.                                        | [44] |

|                                |             |      |                                                                                                  |        |                   |                   |                   |            |                        |      |                                                 |                                                                                                                                                           |      |
|--------------------------------|-------------|------|--------------------------------------------------------------------------------------------------|--------|-------------------|-------------------|-------------------|------------|------------------------|------|-------------------------------------------------|-----------------------------------------------------------------------------------------------------------------------------------------------------------|------|
| Livestock synthetic wastewater | MPP and MAP | NaOH | $\text{MgCL}_2 \cdot 6\text{H}_2\text{O}$<br>$\text{NaH}_2\text{PO}_4 \cdot 2\text{H}_2\text{O}$ | 10     | Mg:K:P = 1:1:1    | 50-57 % P         | BCRDT             | Continuous | 11.5 L                 | 2.3  | -                                               | MPP yield was 36% for N concentrations below 1.1 mM.                                                                                                      | [50] |
| Manure liquid fraction         | MPP and MAP | -    | KCl and $\text{Na}_3\text{PO}_4 \cdot \text{H}_2\text{O}$                                        | 10.3   | Mg:K:P= 1:1:1     | 60-80 % P         | CSTR              | Batch      | 1 L                    | -    | -                                               | The best recovery performance was achieved at 38 °C.                                                                                                      | [56] |
| Swine wastewater               | MPP and MAP | NaOH | $\text{MgCL}_2 \cdot 6\text{H}_2\text{O}$                                                        | 10     | K:N= 6:1          | >95 % P           | CSTR              | Batch      | 0.5 L                  | -    | 1.27 \$/kg $\text{PO}_4^{3-}$ -P removed        | When the K to TAN molar ratio was 6, the competition ratio between the K-struvite and struvite reached 93.7%.                                             | [59] |
| Synthetic wastewater           | MPP and MAP | KOH  | $\text{MgCL}_2 \cdot 6\text{H}_2\text{O}$<br>$\text{NH}_4\text{H}_2\text{PO}_4$                  | 9      | -                 | -                 | BSTR <sup>a</sup> | Batch      | 0.5 L                  | -    | -                                               | Temperature and stirring rate are significant factors in the mass yield of K-struvite crystals.                                                           | [62] |
| SPU                            | MPP         | NaOH | $\text{MgCL}_2 \cdot 6\text{H}_2\text{O}$                                                        | 10.5   | Mg:P= 1:1         | 20 % K<br>80 % P  | Pilot-scale FBR   | Continuous | n.s.                   | n.s. | -                                               | Small amount of fine crystals flowing out with the effluent, which was caused by the attrition and breakage of pellets during the stable operation of FBR | [67] |
| Source-separated urine         | MPP         | NaOH | $\text{MgCL}_2 \cdot 6\text{H}_2\text{O}$                                                        | 10.7   | MgO:K:P = 4:1:1.6 | 100 % P<br>70 % K | CSTR              | Batch      | 1 L                    |      | 2.79 - 5.42, \$/m <sup>3</sup> of treated urine | When the Na:K molar ratio was >10, the precipitation of Na was more than that of K.                                                                       | [71] |
| SPS                            | MPP         | NaOH | $\text{MgCL}_2 \cdot 6\text{H}_2\text{O}$                                                        | 10     | P:K = 1:4.9       | -                 | DTBR              | Continuous | 0.25 L·h <sup>-1</sup> | -    | -                                               | Ammonia removal from urine is a crucial step to precipitate K-struvite                                                                                    | [75] |
| Manure effluent                | MAP         | NaOH | $\text{MgCL}_2 \cdot 6\text{H}_2\text{O}$                                                        | 9      | Mg:N:P = 1.5:1:1  | 86 % P<br>97 % N  | CSTR              | Batch      | 0.15 L                 | -    | -                                               | Presence of high concentrations of Ca led to complete $\text{PO}_4^{3-}$ recovery in form of struvite.                                                    | [89] |
| Poultry manure                 | MPP and MAP | KOH  | $\text{MgCL}_2 \cdot 6\text{H}_2\text{O}$                                                        | 8.5    | -                 | 90 % P            | CSTR              | Batch      | 1 L                    | 1 h  | -                                               | -                                                                                                                                                         | [90] |
| Pumpkin waste                  | MPP         | NaOH | $\text{MgCL}_2 \cdot 6\text{H}_2\text{O}$<br>$\text{NaH}_2\text{PO}_4 \cdot 2\text{H}_2\text{O}$ | 9.5÷10 | Mg:K:P= 1:2:2     | 80 % K            | -                 | -          | -                      | -    | -                                               | -                                                                                                                                                         | [91] |

|                              |             |      |                                                                           |     |                    |                                   |                                  |       |         |        |                                                    |                                                                                                                                                                                                       |       |
|------------------------------|-------------|------|---------------------------------------------------------------------------|-----|--------------------|-----------------------------------|----------------------------------|-------|---------|--------|----------------------------------------------------|-------------------------------------------------------------------------------------------------------------------------------------------------------------------------------------------------------|-------|
| Anaerobically digested swine | MAP         | NaOH | MgCL <sub>2</sub> ·6H <sub>2</sub> O                                      | 9.5 | Mg:N:P = 1.5:1:2   | 99 % P<br>99 % N                  | CSTR                             | Batch | 5 L     | -      | -                                                  | -                                                                                                                                                                                                     | [94]  |
| Cattle manure wastewater     | MPP and MAP | NaOH | MgCL <sub>2</sub> ·6H <sub>2</sub> O                                      | 10  | Mg:P:N= 1.5:1.25:1 | 10 % K<br>77 % P                  | CSTR                             | Batch | 0.250 L | 1 h    | -                                                  | Potassium removal efficiency was significantly lower than that of ammonium. The molar percentage of the removed K <sup>+</sup> over the total removed NH <sub>4</sub> <sup>+</sup> was less than 10%. | [95]  |
| Produced wastewater          | MPP and MAP | NaOH | MgCL <sub>2</sub> ·6H <sub>2</sub> O                                      | 9.5 | Mg:N:P = 1.5:1:1.5 | 85.9 % N<br>24.8 % K<br>96.8 % Mg | CSTR                             | Batch | 0.15L   | -      | -                                                  | The precipitated struvite had high purity and showed the absence of heavy metals, indicating the sufficient quality for applications as fertilizers.                                                  | [99]  |
| Landfill leachate            | MPP and MAP | NaOH | MgSO <sub>4</sub><br>Na <sub>2</sub> HPO <sub>4</sub> ·12H <sub>2</sub> O | -   | Mg:K:P= 3:1:3      | 53 % K                            | Cation-exchange membrane reactor | -     | 0.2 L   | 20 min | 3.74\$/m <sup>3</sup> of treated landfill leachate | Combined electrochemical oxidation/magnesium potassium phosphate crystallization process is demonstrated to be an effective method for recycling of NF concentrates generated from a landfill plant.  | [100] |
| Landfill leachate            | MPP and MAP | -    | -                                                                         | 9.5 | Mg: P = 1:1.5      | 19.3 % Mg<br>29.8 % P             | Membrane FO reactor              | -     | -       | -      | -                                                  | Calcium pretreatment improves the recovery of pure struvite.                                                                                                                                          | [101] |

<sup>a</sup> Pyrex glass vessel mechanically agitated; <sup>b</sup> volume of struvite collected in settler plus the scaling removed; <sup>c</sup> reaction zone volume; n.s. not specified.
