# Supplementary material for: Is K-Struvite Precipitation a Plausible Nutrient Recovery Method from Potassium-Containing Wastes?—A Review
Source: MDPI journal article supplement (doi:10.3390/su141811680), 2022-09-17
Supplement: s1 [file s1]

Archive with 1 entries (1 files):
- sustainability-1881918-supplementary.pdf
